# Supplementary material for: A novel rhodamine-3,4-dihydro-2H-1,3-benzoxazine conjugate as a highly sensitive and selective chemosensor for Fe3+ions with cytoplasmic cell imaging possibilities
Source: Royal Society of Chemistry journal article supplement (doi:10.1039/c5ay00754b), 2015-01-01
Supplement: c5ay00754b1.pdf [file c5ay00754b1.pdf]

## Supporting Information for

# **A novel *rhodamine-3,4-dihydro-2H-1,3-benzoxazine* conjugate as a highly sensitive and selective chemosensor for Fe<sup>3+</sup> ion with cytoplasmic cell imaging possibilities**

Habib Ali Molla<sup>a</sup>, Rahul Bhowmick<sup>a</sup>, Atul Katarkar<sup>b</sup>, Keya Chaudhuri<sup>b</sup>, Sumana Gangopadhyay<sup>c</sup>, and Mahammad Ali<sup>a,\*</sup>

Department of Chemistry, Jadavpur University, Kolkata 700 032, India, Fax: 91-33-2414-6223,  
E-mail: [mali@chemistry.jdvu.ac.in](mailto:mali@chemistry.jdvu.ac.in), [mali@chemistry.jdvu.ac.in](mailto:mali@chemistry.jdvu.ac.in)

## Table of contents

1. <sup>1</sup>H NMR spectrum of RH-BZN, **Figure S1**
2. <sup>13</sup>C NMR spectrum of RH-BZN, **Figure S2**
3. IR Spectrum of RH-BZN and RH-BZN +Fe<sup>3+</sup>complex, **Figure S3**
4. Mass spectrum of RH-BZN in CH<sub>3</sub>CN, **Figure S4**
5. Mass spectrum of RH-BZN +Fe<sup>3+</sup>in CH<sub>3</sub>CN and simulated spectra, **Figure S5a and S5b**
6. Cytotoxicity test of the ligand RH-BZN, **Figure S6**
7. Job's diagram, **Figure S7**
8. Fluorescence emission in varying water contain, **Figure S8**
9. Fluorescence emission spectra of different metals, **Figure S9**
10. pH variation plot, **Figure S10**
11. Fluorescence emission spectra of different anions, **Figure S11**

12. Limit of detection calculation, **Figure S12**

13. Re-establishment of spirolactam ring by absorption spectra , **Figure S13**

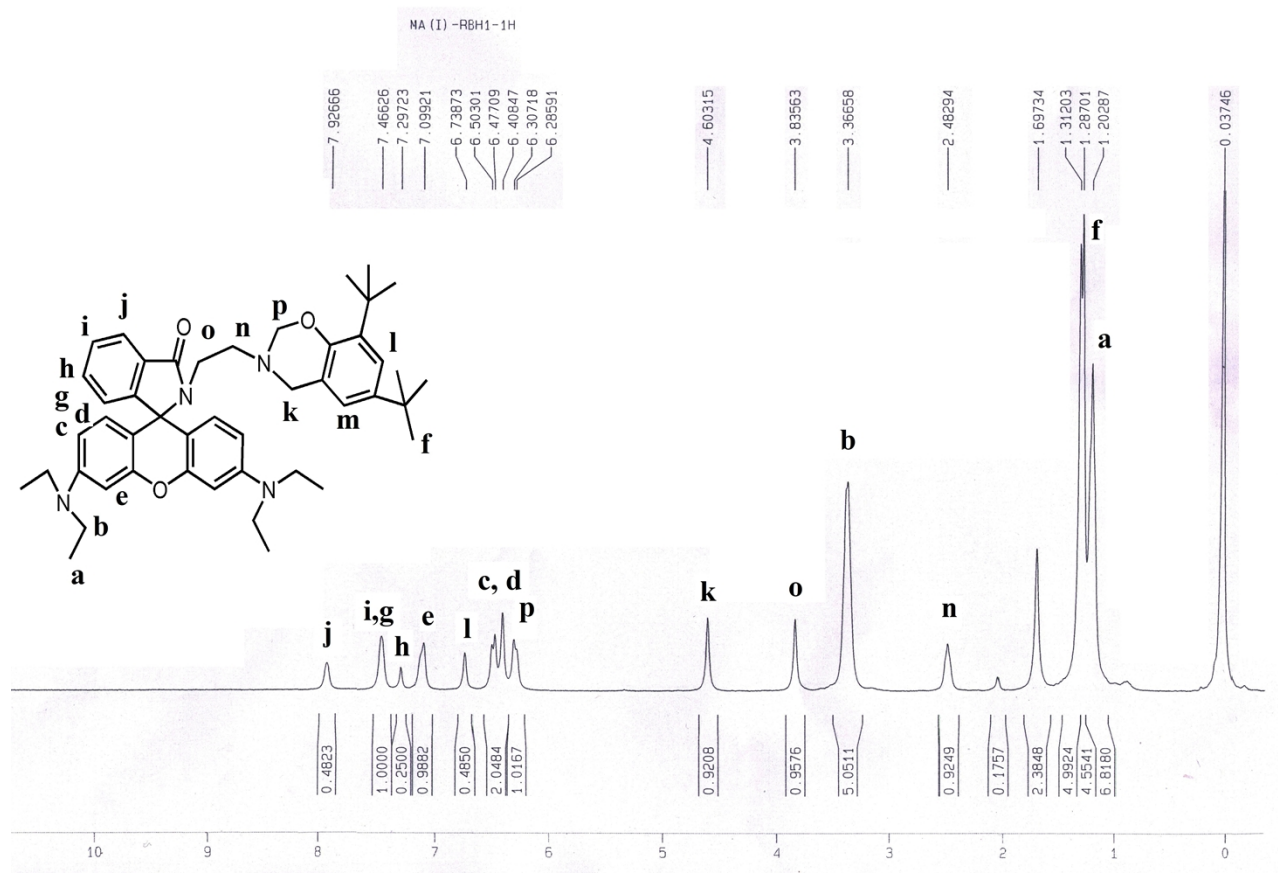

**Fig S1.**  $^1\text{H}$  NMR spectrum of RH-BZN.

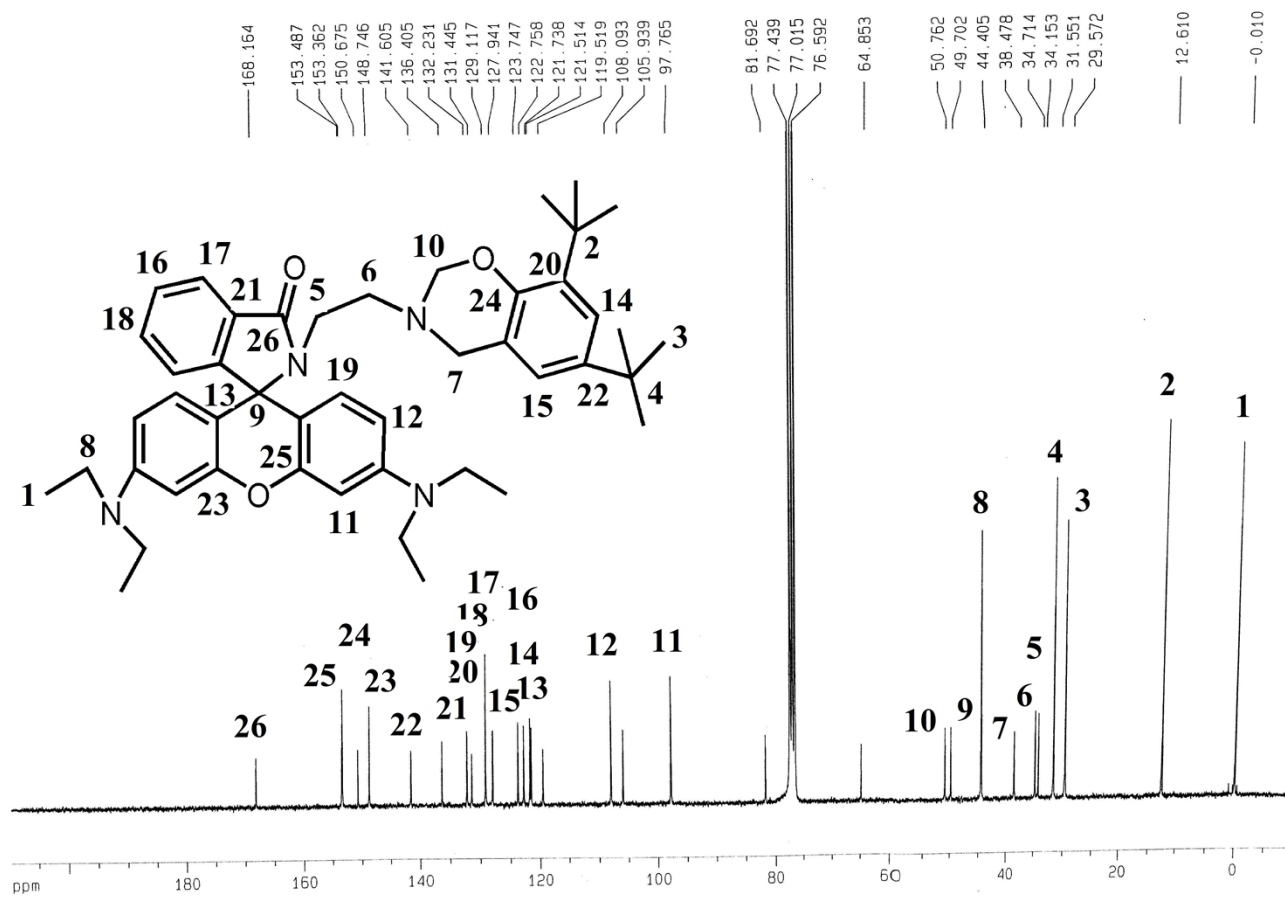

**Fig S2.**  $^{13}\text{C}$  NMR spectrum of RH-BZN.

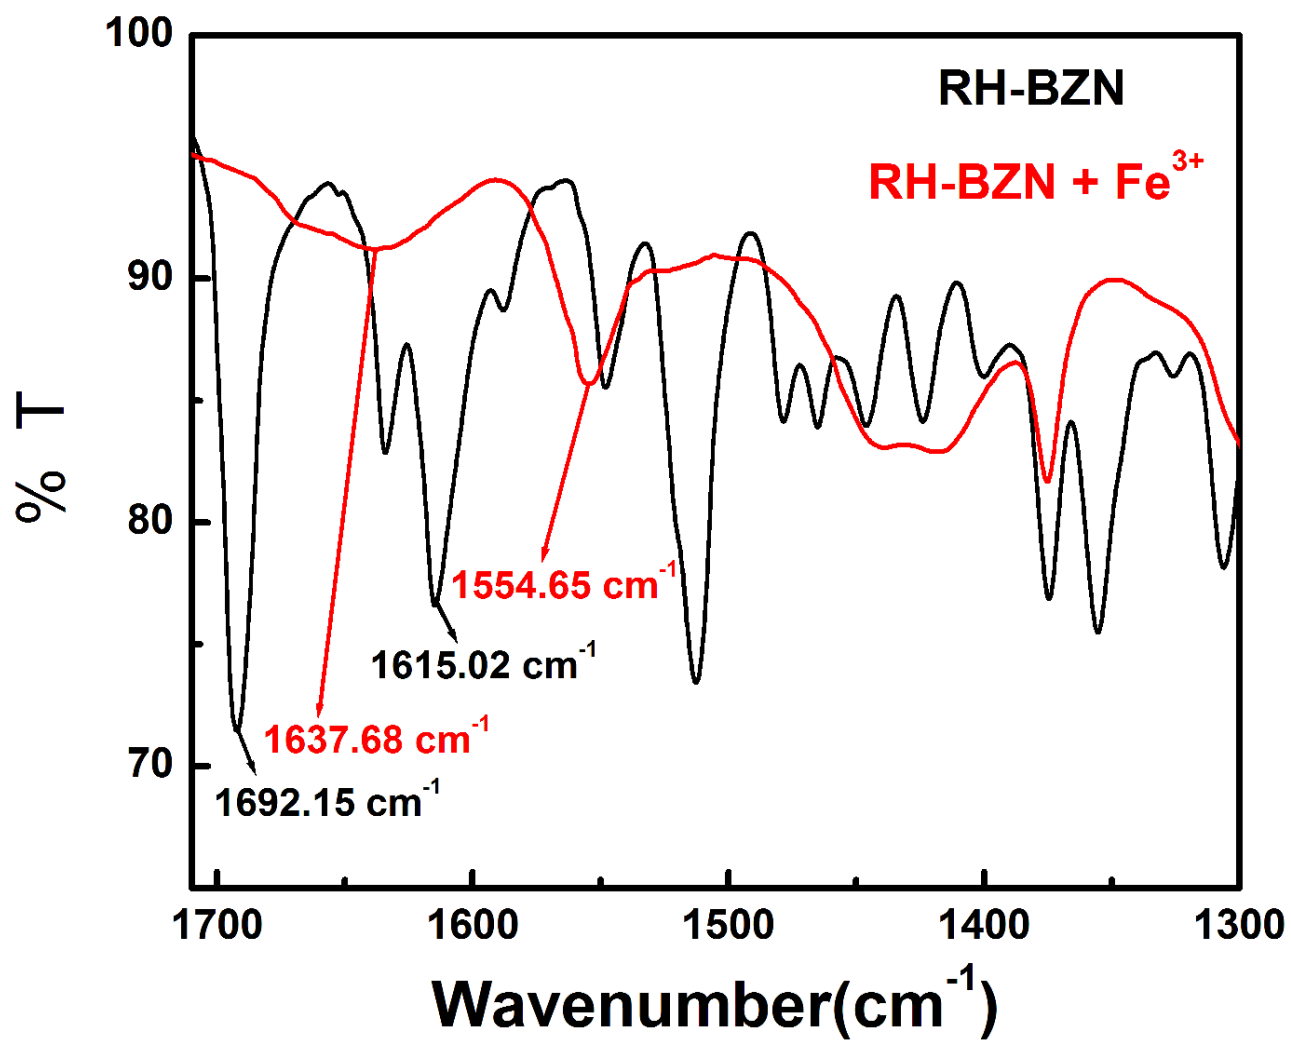

**Fig S3 .** IR Spectrum of **RH-BZN** (**3**) and **RH-BZN-Fe<sup>3+</sup>** (**4**) complex.

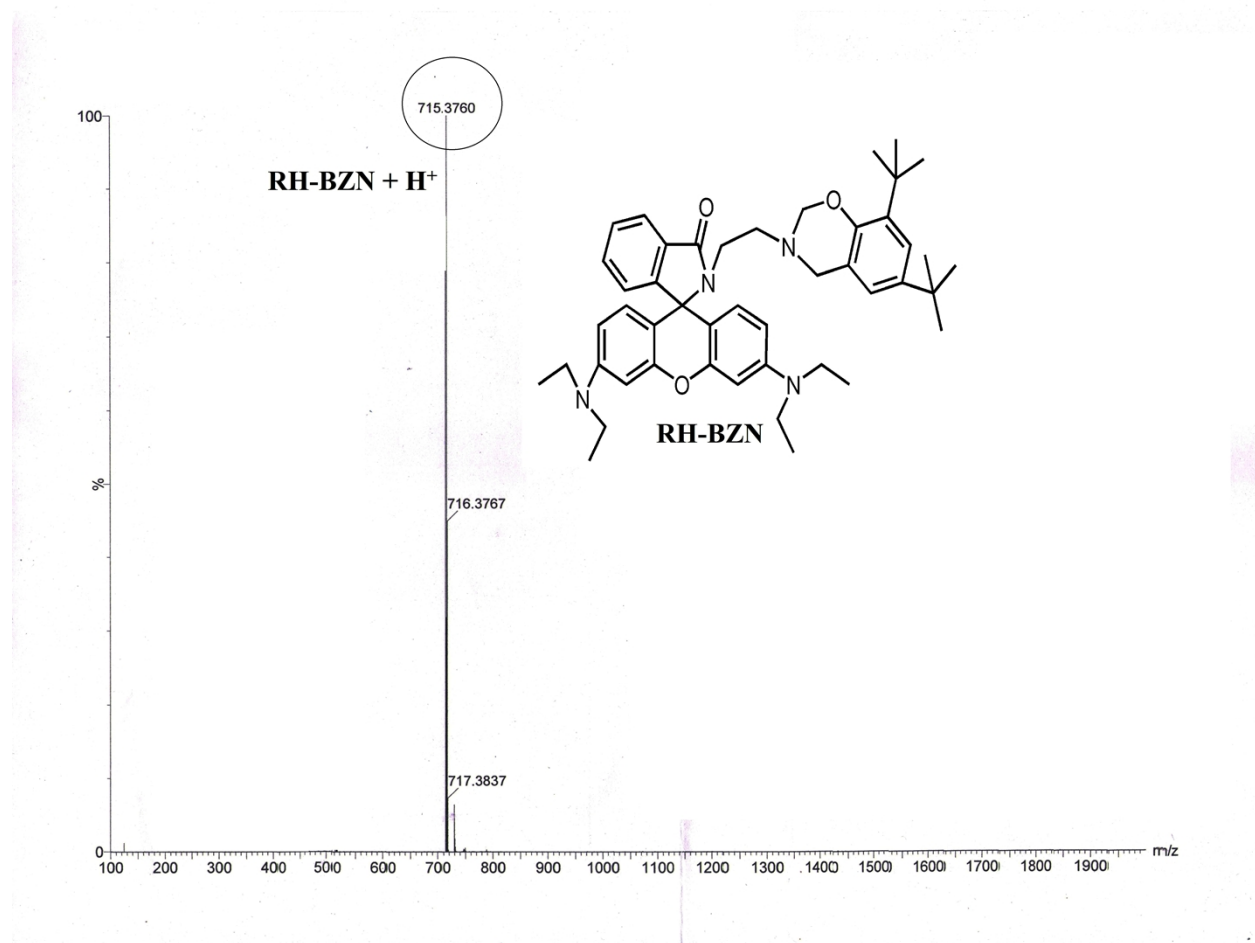

**Fig S4 .** Mass spectrum of RH-BZN in CH<sub>3</sub>CN.

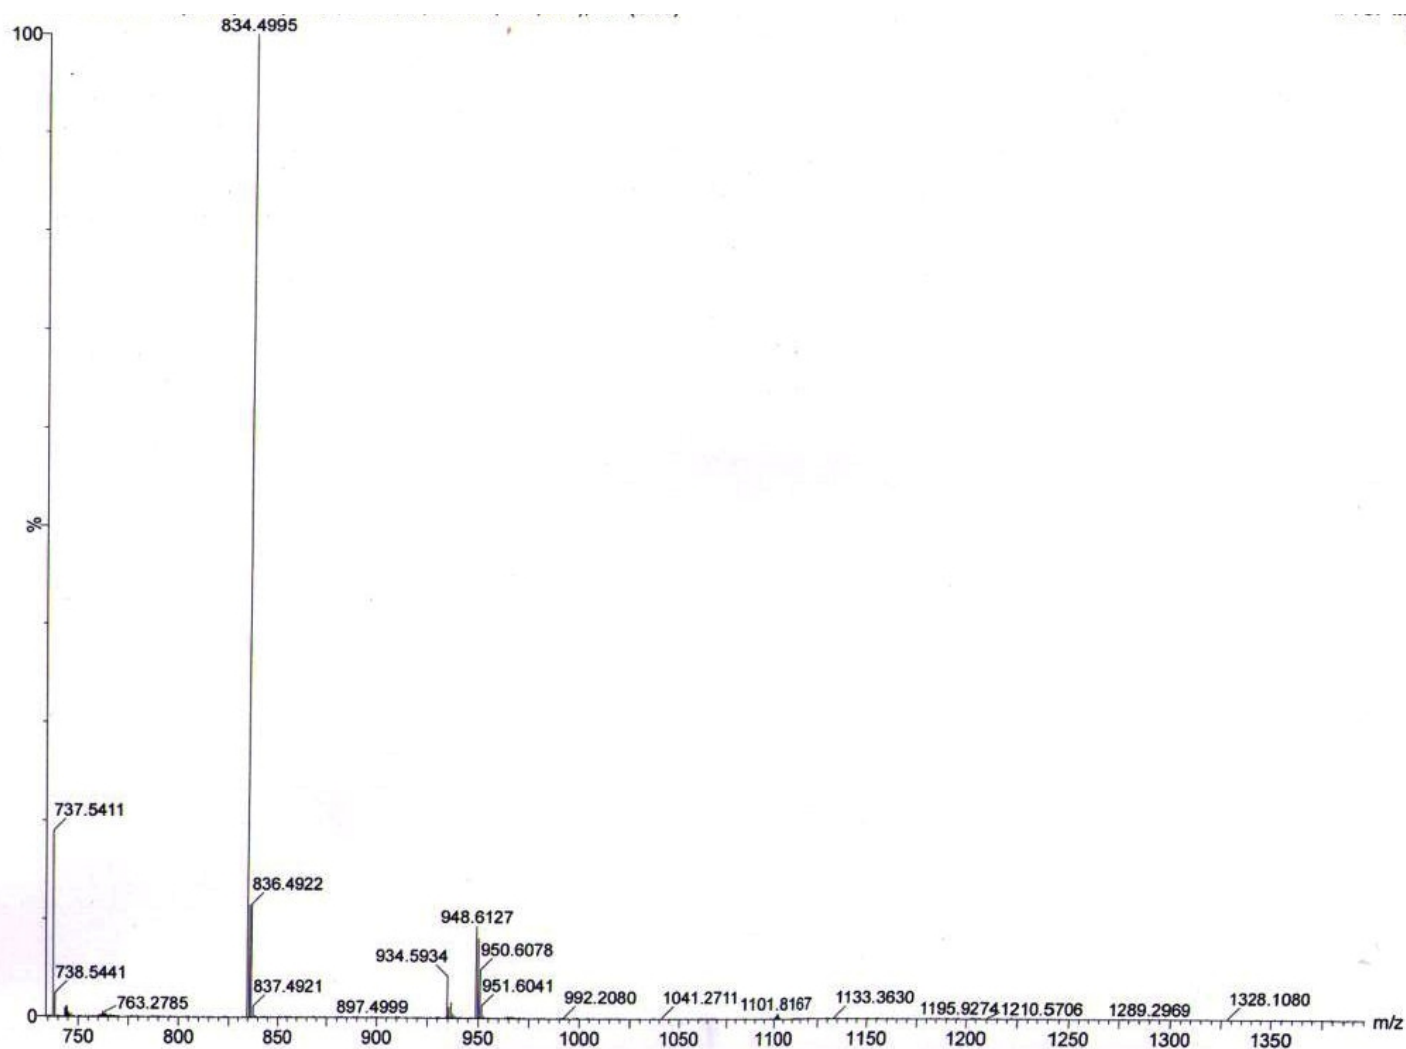

**Fig S5a.** Mass spectrum of RH-BZN -Fe complex in CH<sub>3</sub>CN and simulation spectra.

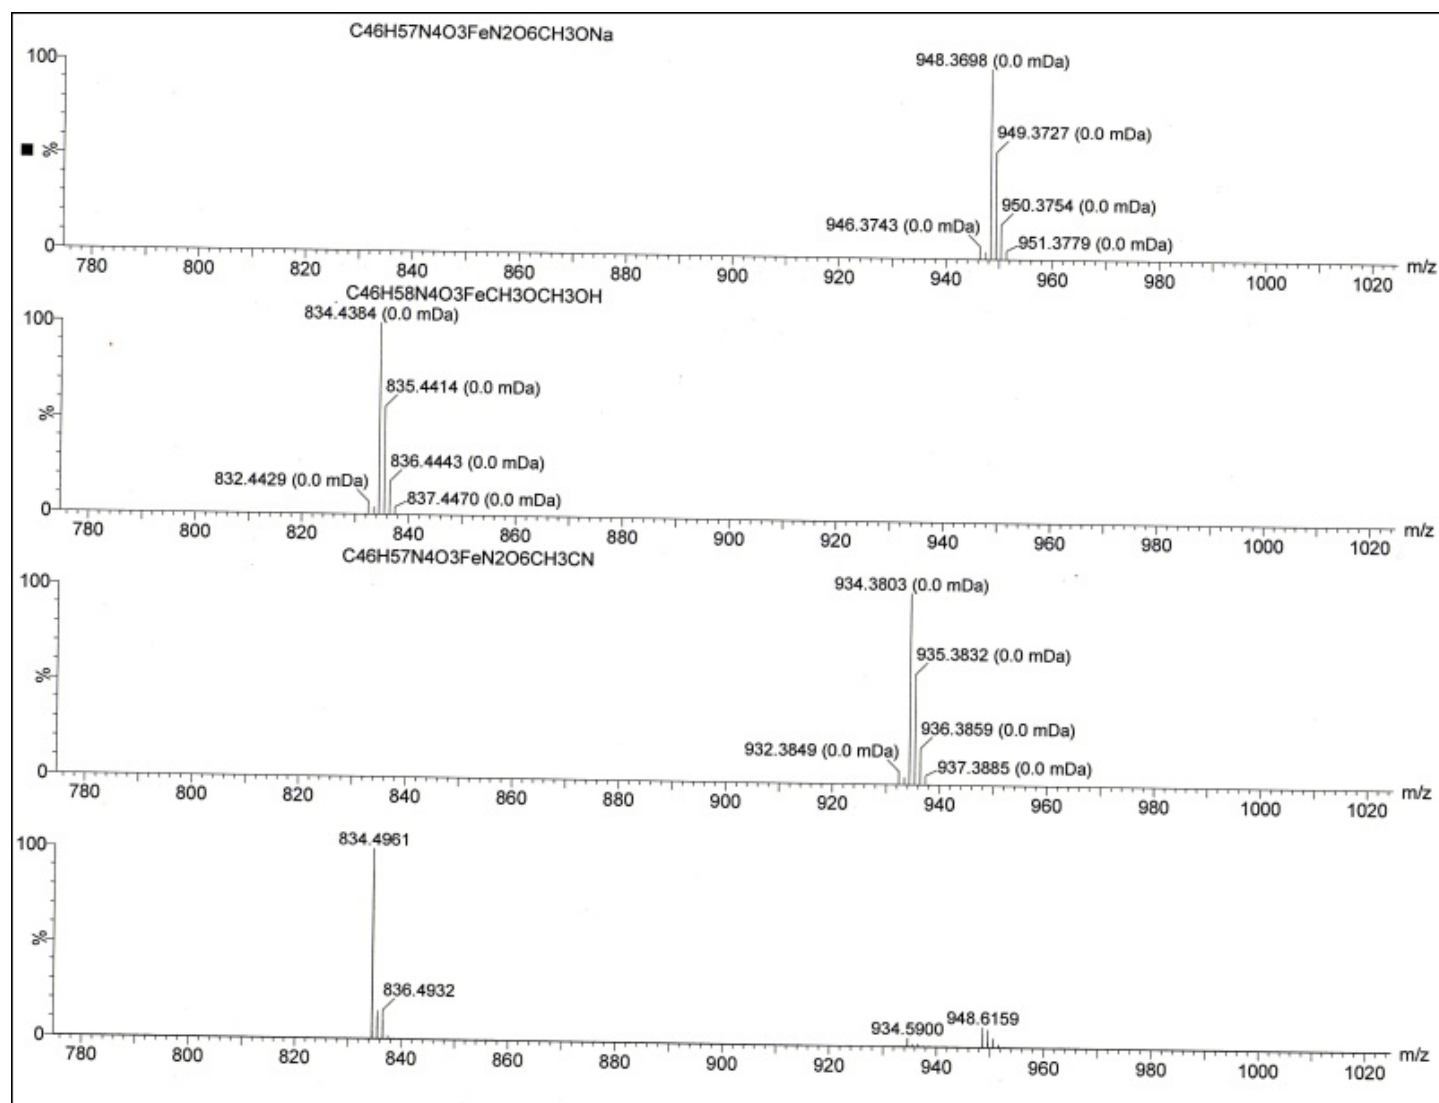

**Fig S5b** Mass spectrum of RH-BZN- $Fe^{3+}$  complex in  $CH_3CN$  and corresponding simulated spectra.



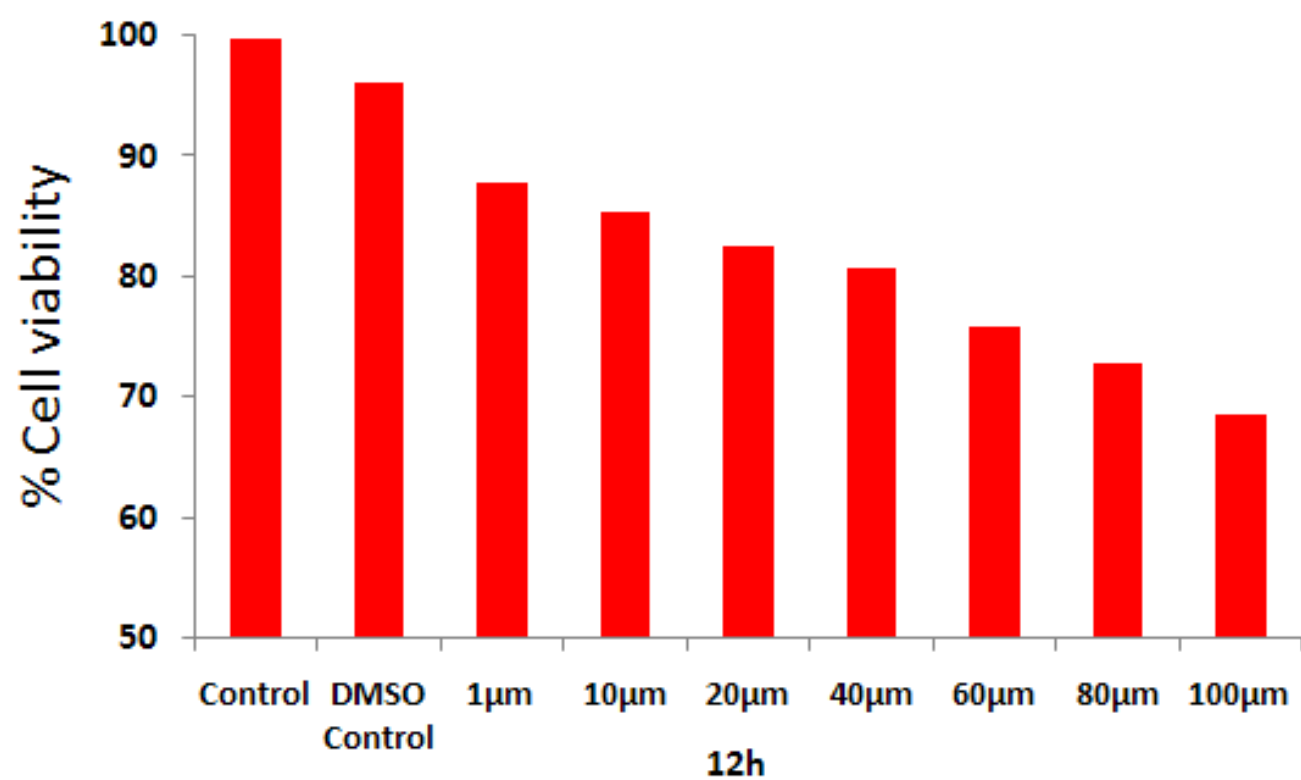

**Fig S6.** Cytotoxicity test of RH-BZN.

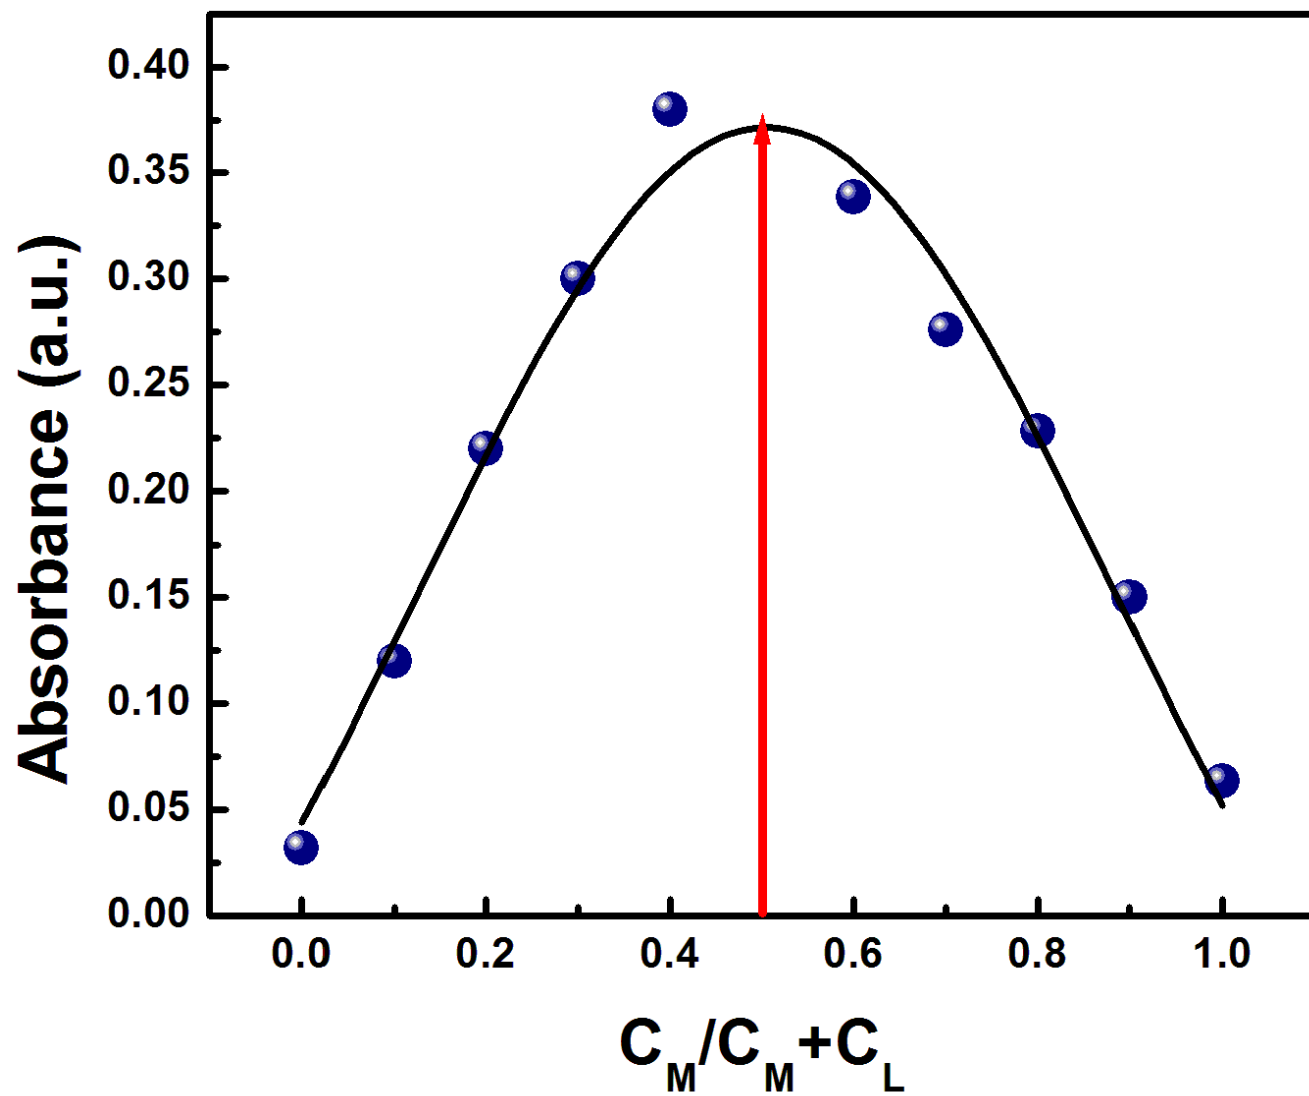

**Fig S7.** Jobs plot (M= Fe<sup>3+</sup> and L= RH-BZN).

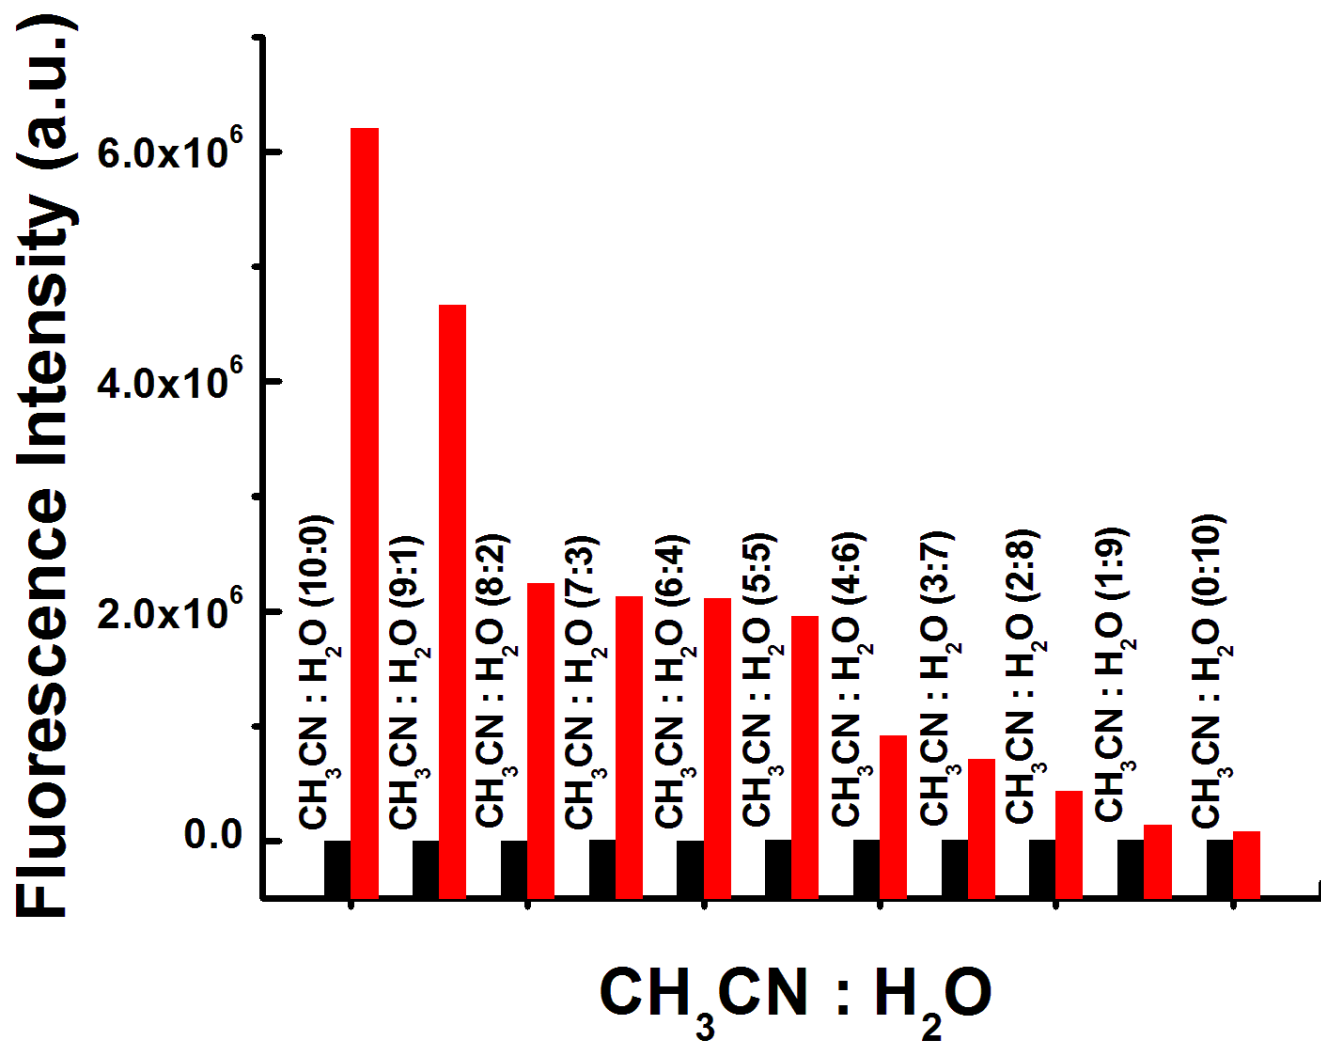

Fig S8. Fluorescence emission with varying water contain

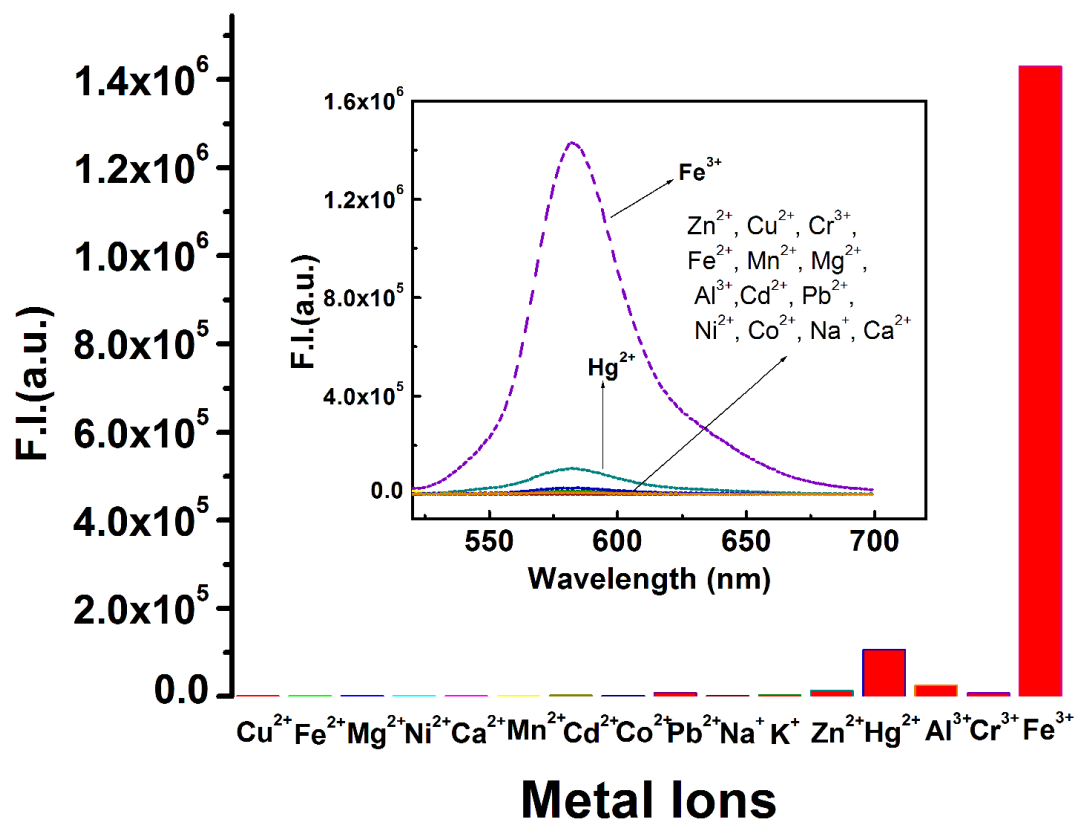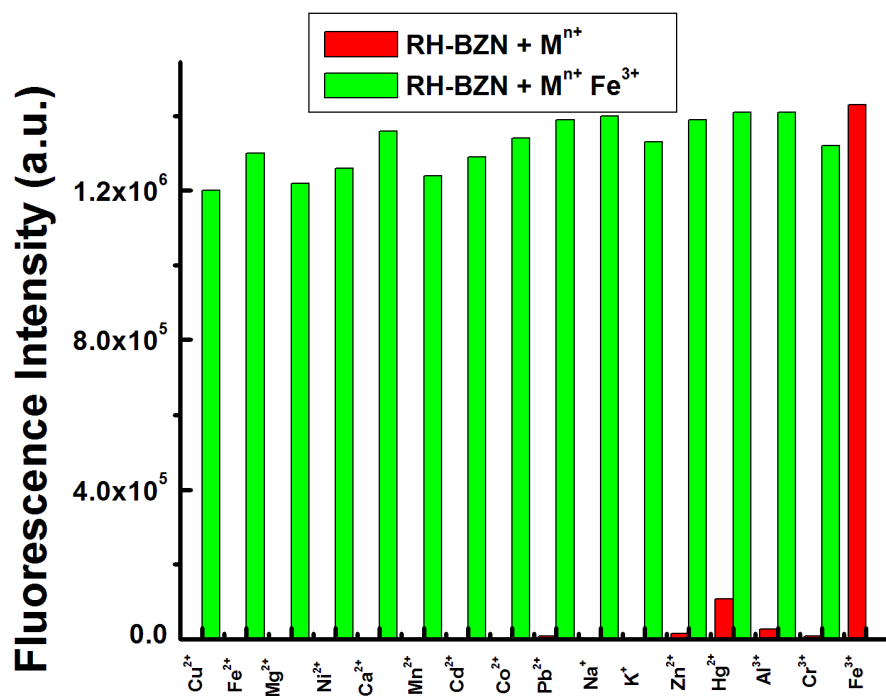

**Fig S9.** Fluorescence emission spectra of different metals in  $\text{CH}_3\text{CN} : \text{H}_2\text{O}$  (7:3) medium.

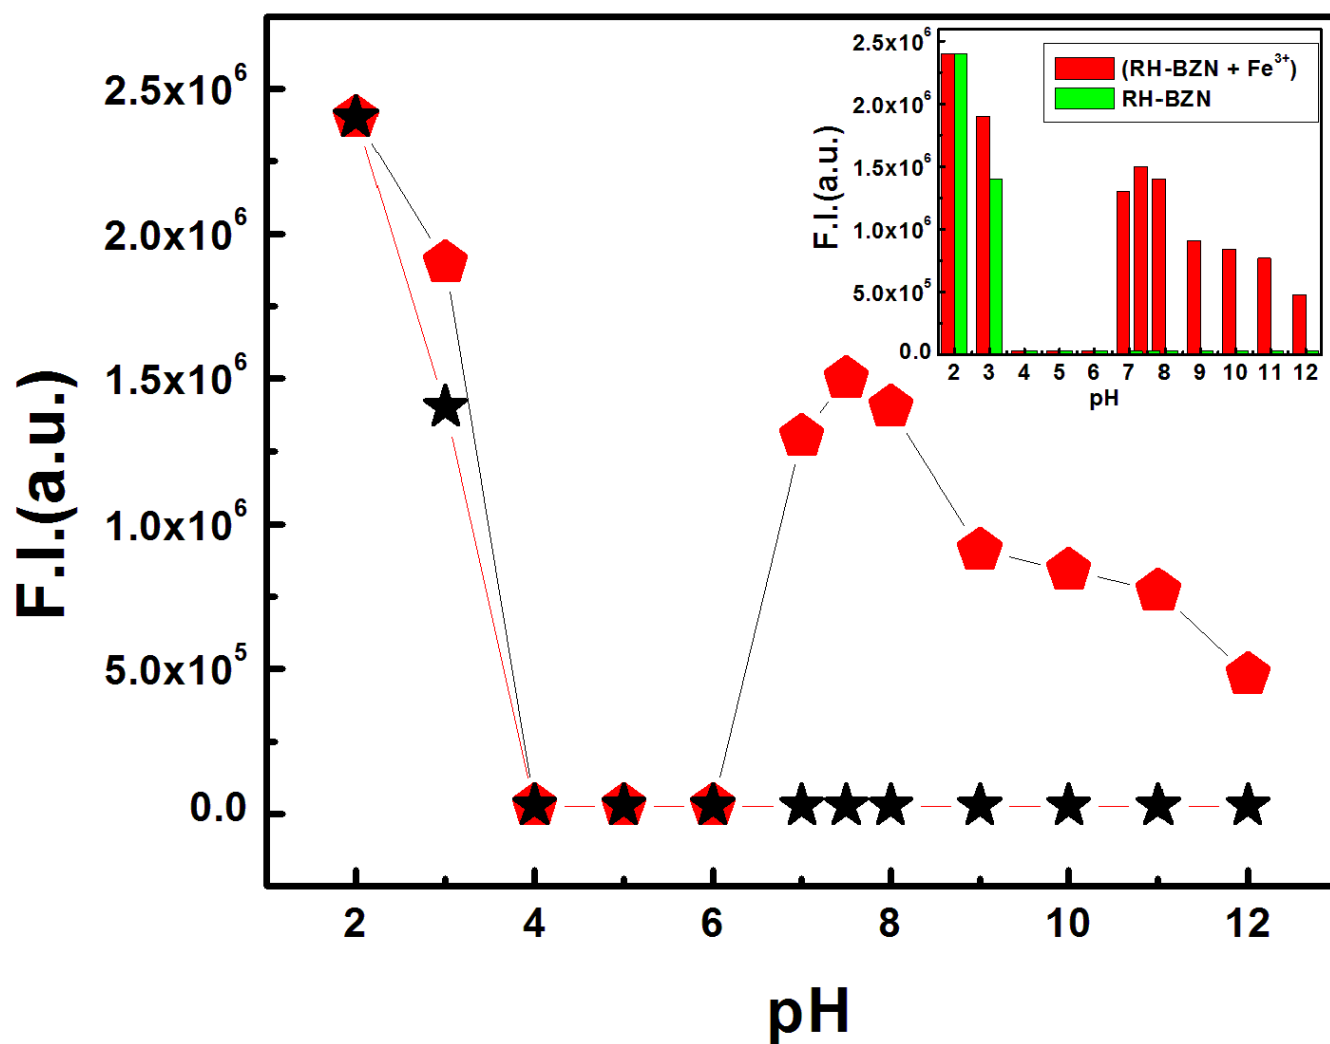

**Fig S10.** Effect of pH on the fluorescence of free **RH-BZN** and **RH-BZN-Fe<sup>3+</sup>** complex.

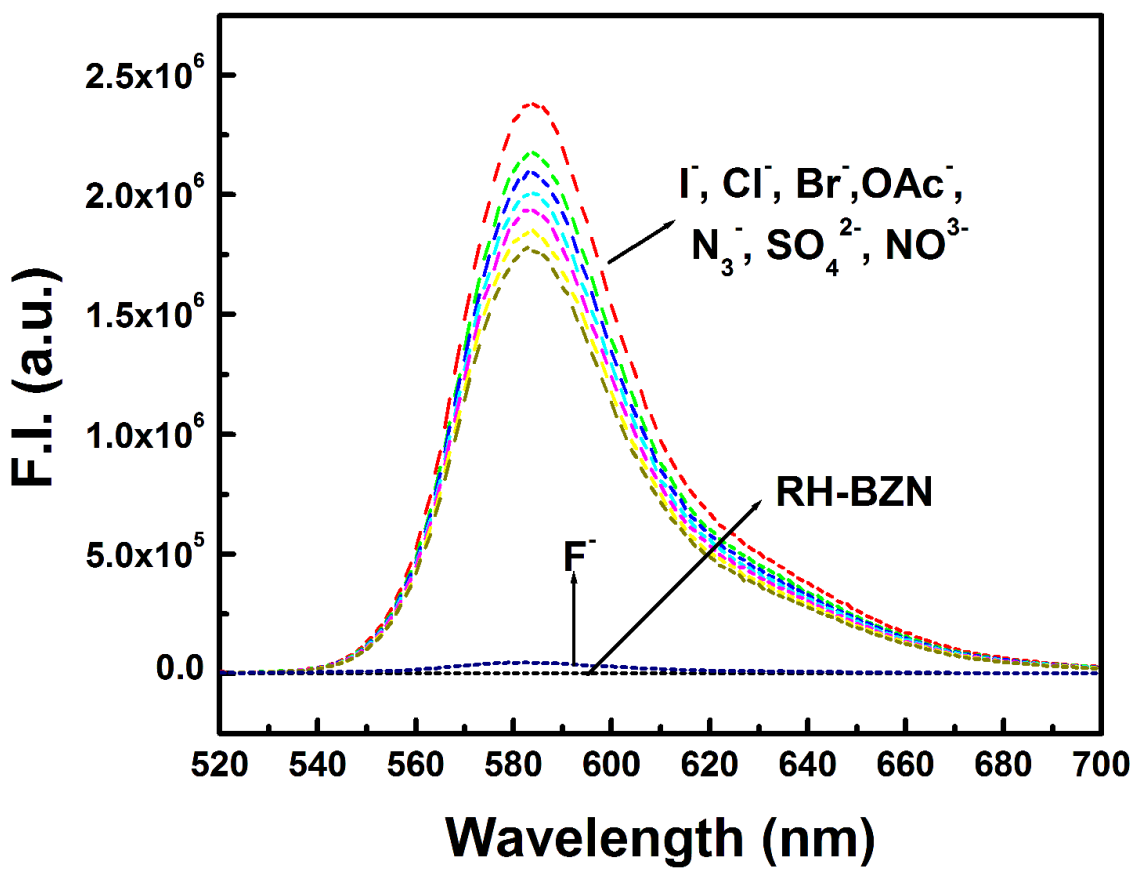

**Fig S11.** Fluorescence emission spectra of different anions in  $\text{CH}_3\text{CN} : \text{H}_2\text{O}$  (7:3) medium.

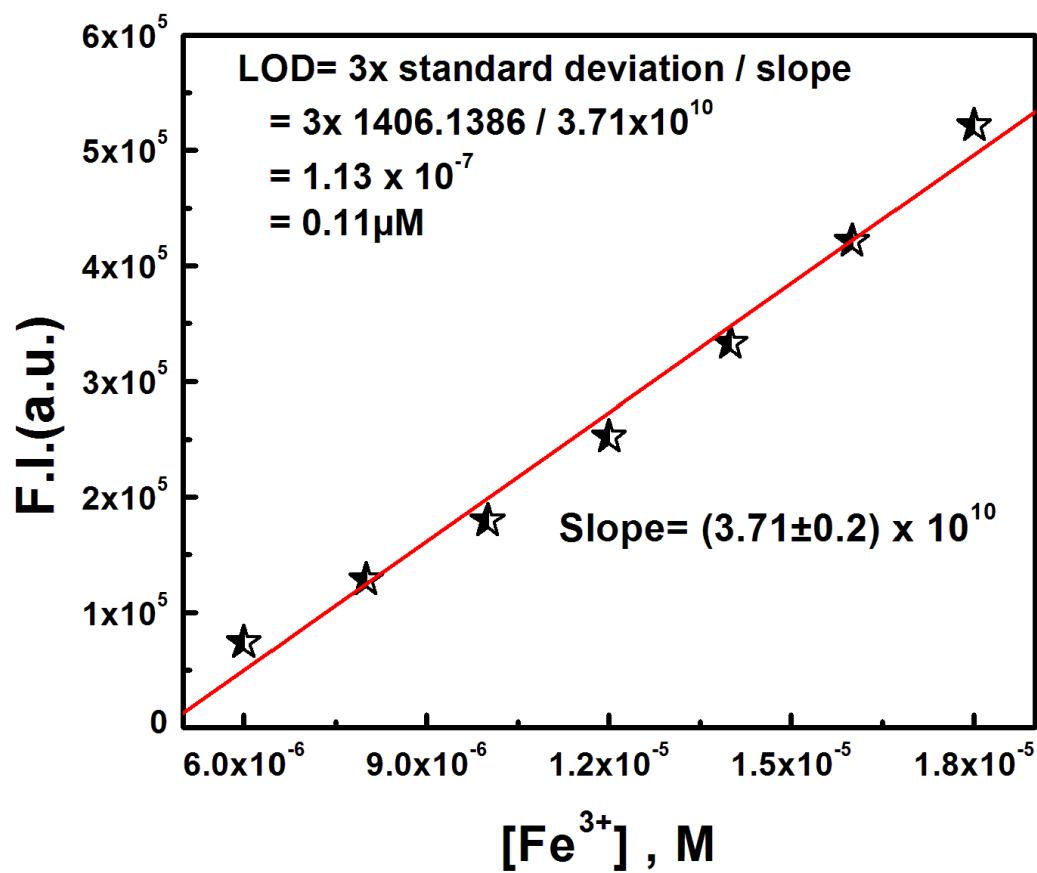

Fig S12. Limit of detection (LOD) calculation.

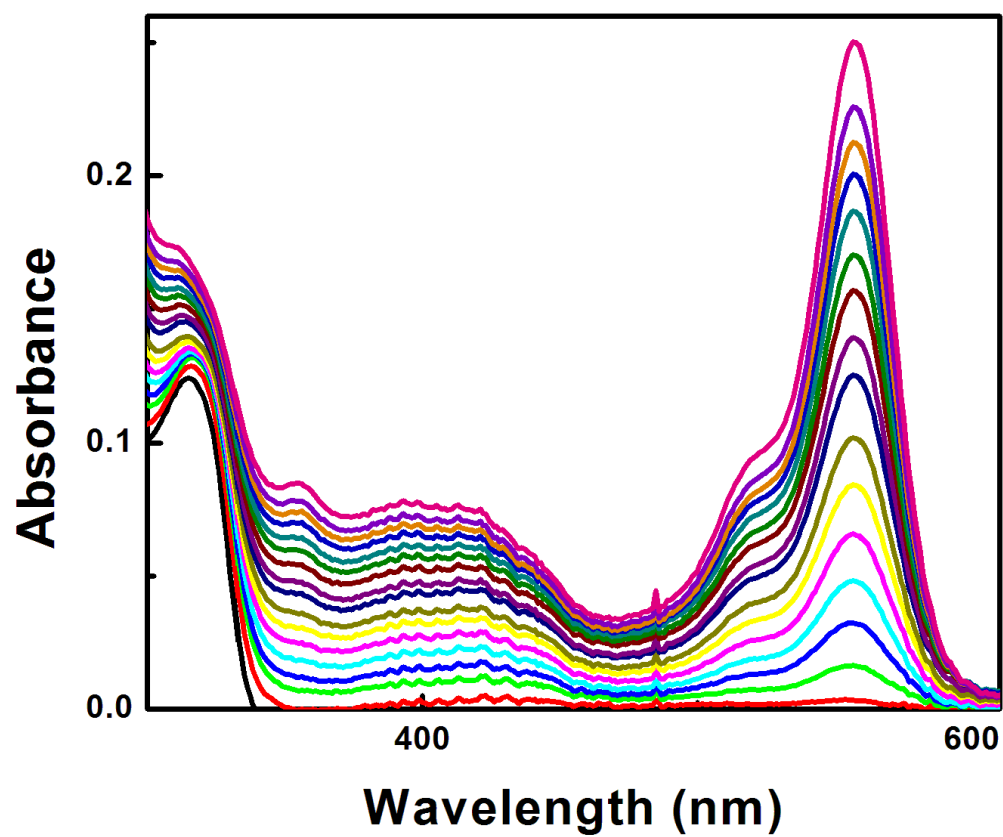

**Fig. S13** Re-establishment of spirolactam ring by absorption spectra (decreasing spectra).
